# Supplementary material
Source: ML conference proceedings conference paper supplement (https://proceedings.neurips.cc/paper_files/paper/2022/hash/3a48b0eaba26ba862220a307a9edb0bb-Abstract.html)
Supplement: Supplementary file 1 [file 3a48b0eaba26ba862220a307a9edb0bb-Supplemental-Datasets_and_Benchmarks.zip]

Archive with 20 entries (18 files):
- supp/
- __MACOSX/._supp
- supp/materials/
- __MACOSX/supp/._materials
- supp/.DS_Store
- __MACOSX/supp/._.DS_Store
- supp/video.mp4
- __MACOSX/supp/._video.mp4
- supp/real_measurements.zip
- __MACOSX/supp/._real_measurements.zip
- supp/supp_material.pdf
- __MACOSX/supp/._supp_material.pdf
- supp/materials/mp3d_material_config.json
- __MACOSX/supp/materials/._mp3d_material_config.json
- supp/materials/default_material_to_category.py
- __MACOSX/supp/materials/._default_material_to_category.py
- supp/materials/default_material_coefficients.py
- __MACOSX/supp/materials/._default_material_coefficients.py
- supp/materials/category_to_material_mapping.py
- __MACOSX/supp/materials/._category_to_material_mapping.py
