# Supplementary material
Source: ML conference proceedings conference paper supplement (https://proceedings.neurips.cc/paper_files/paper/2022/hash/3a48b0eaba26ba862220a307a9edb0bb-Abstract.html)
Supplement: Supplementary file 1 [file 3a48b0eaba26ba862220a307a9edb0bb-Supplemental-Datasets_and_Benchmarks.zip › supp/materials/category_to_material_mapping.py]

CATEGORY_TO_ACOUSTIC_MATERIAL_MAPPING = {
    'ceiling': ['Acoustic Tile', 'Gypsum Board'],
    'fireplace': ['Brick', 'Brick, Painted'],
    'floor': ['Carpet', 'Carpet, Heavy', 'Carpet, Heavy Padded', 'Acoustic Tile', 'Tile, Ceramic', 'Concrete',
              'Concrete, Rough', 'Concrete Block', 'Concrete Block, Painted', 'wood, Thin', 'wood, Thick',
              'Wood Floor', 'Wood On Concrete'],
    'mat': ['Carpet', 'Carpet, Heavy', 'Carpet, Heavy Padded'],
    'rug': ['Carpet', 'Carpet, Heavy', 'Carpet, Heavy Padded'],
    'shower-stall': ['Tile, Ceramic', 'Glass', 'Glass, Heavy'],
    'shower': ['Tile, Ceramic', 'Glass', 'Glass, Heavy'],
    'toilet': ['Tile, Ceramic'],
    'backpack': ['Curtain'],
    'clothes': ['Curtain'],
    'beanbag': ['Curtain'],
    'bed': ['Curtain'],
    'blanket': ['Curtain'],
    'cloth': ['Curtain'],
    'clothing': ['Curtain'],
    'comforter': ['Curtain'],
    'cushion': ['Curtain'],
    'curtain': ['Curtain'],
    'handbag': ['Curtain'],
    'scarf': ['Curtain'],
    'sofa': ['Curtain'],
    'bag': ['Curtain'],
    'set-of-clothing': ['Curtain'],
    'towel': ['Curtain'],
    'indoor-plant': ['Foliage', 'Soil'],
    'plant': ['Foliage', 'Soil'],
    'blinds': ['Glass', 'Glass, Heavy'],
    'mirror': ['Glass', 'Glass, Heavy'],
    'tv_monitor': ['Glass', 'Glass, Heavy'],
    'lighting': ['Glass', 'Glass, Heavy'],
    'window': ['Glass', 'Glass, Heavy'],
    'wall': ['Brick', 'Brick, Painted', 'Gypsum Board', 'Plaster on Brick', 'Plaster on Concrete Block'],
    'bathtub': ['Tile, Ceramic', 'Steel'],
    'beam': ['Steel'],
    'handrail': ['Steel'],
    'railing': ['Steel'],
    'appliances': ['Steel'],
    'major-appliance': ['Steel'],
    'microwave': ['Steel', 'Glass'],
    'pipe': ['Steel'],
    'refrigerator': ['Steel'],
    'gym_equipment': ['Steel'],
    'sink': ['Steel', 'Tile, Ceramic'],
    'chair': ['wood, Thin', 'wood, Thick'],
    'furniture': ['wood, Thin', 'wood, Thick', 'Curtain'],
    'chopping-board': ['wood, Thin', 'wood, Thick'],
    'countertop': ['wood, Thin', 'wood, Thick', 'Tile, Ceramic'],
    'counter': ['wood, Thin', 'wood, Thick', 'Tile, Ceramic'],
    'shelving': ['wood, Thin', 'wood, Thick'],
    'desk': ['wood, Thin', 'wood, Thick'],
    'seating': ['wood, Thin', 'wood, Thick'],
    'chest_of_drawers': ['wood, Thin', 'wood, Thick'],
    'stairs': ['wood, Thin', 'wood, Thick', 'Carpet', 'Carpet, Heavy', 'Carpet, Heavy Padded', 'Acoustic Tile',
               'Tile, Ceramic', 'Concrete',
               'Concrete, Rough', 'Concrete Block', 'Concrete Block, Painted', 'wood, Thin', 'wood, Thick',
               'Wood Floor', 'Wood On Concrete'],
    'nightstand': ['wood, Thin', 'wood, Thick'],
    'board_panel': ['wood, Thin', 'wood, Thick'],
    'shelf': ['wood, Thin', 'wood, Thick'],
    'stool': ['wood, Thin', 'wood, Thick'],
    'table': ['wood, Thin', 'wood, Thick'],
    'door': ['wood, Thin', 'wood, Thick', 'Glass', 'Glass, Heavy'],
    'table-runner': ['Curtain'],
    'wardrobe': ['wood, Thin', 'wood, Thick'],
    'base-cabinet': ['wood, Thin', 'wood, Thick'],
    'cabinet': ['wood, Thin', 'wood, Thick'],
    'stair': ['wood, Thin', 'wood, Thick', 'Carpet', 'Carpet, Heavy', 'Carpet, Heavy Padded', 'Acoustic Tile',
              'Tile, Ceramic', 'Concrete',
              'Concrete, Rough', 'Concrete Block', 'Concrete Block, Painted', 'wood, Thin', 'wood, Thick',
              'Wood Floor', 'Wood On Concrete'],
}
