# Supplementary material
Source: ML conference proceedings conference paper supplement (https://proceedings.neurips.cc/paper_files/paper/2022/hash/3a48b0eaba26ba862220a307a9edb0bb-Abstract.html)
Supplement: Supplementary file 1 [file 3a48b0eaba26ba862220a307a9edb0bb-Supplemental-Datasets_and_Benchmarks.zip › supp/materials/default_material_to_category.py]

ACOUSTIC_MATERIAL_LABEL_MAPPING = {
    'Default': ['default'],
    'Acoustic Tile': ['ceiling'],
    'Brick': ['fireplace'],
    'Brick, Painted': [],
    'Carpet': ['floor', 'floor', 'mat'],
    'Carpet, Heavy': ['rug'],
    'Carpet, Heavy Padded': [],
    'Tile, Ceramic': ['shower-stall', 'shower', 'toilet'],
    'Concrete': [],
    'Concrete, Rough': [],
    'Concrete Block': [],
    'Concrete Block, Painted': [],
    'Curtain': ['backpack', 'clothes', 'beanbag', 'bed', 'blanket', 'cloth', 'clothing', 'comforter', 'cushion',
                'curtain', 'handbag', 'scarf', 'sofa', 'bag', 'set-of-clothing', 'towel'],
    'Foliage': ['indoor-plant', 'plant'],
    'Glass': ['blinds', 'mirror', 'tv_monitor', 'lighting', 'window'],
    'Glass, Heavy': [],
    'Grass': [],
    'Gravel': [],
    'Gypsum Board': ['wall'],
    'Plaster on Brick': [],
    'Plaster on Concrete Block': [],
    'Soil': [],
    'Sound Proof': [],
    'Snow': [],
    'Steel': ['bathtub', 'beam', 'handrail', 'railing', 'appliances', 'major-appliance', 'microwave', 'pipe',
              'refrigerator', 'gym_equipment', 'sink'],
    'Water': [],
    'wood, Thin': [],
    'wood, Thick': ['chair', 'furniture', 'chopping-board', 'countertop', 'counter', 'shelving', 'desk', 'door',
                    'seating', 'chest_of_drawers', 'stairs', 'nightstand', 'board_panel', 'shelf', 'stool',
                    'table', 'table-runner', 'wardrobe'],
    'Wood Floor': ['base-cabinet', 'cabinet', 'stair'],
    'Wood On Concrete': []
}
